# Supplementary material
Source: Frontiers journal article supplement (https://www.frontiersin.org/articles/243113)
Supplement: Data_Sheet_1.pdf [file Data_Sheet_1.pdf]

Suppl. Table 1. 36-Item Questionnaire (Original in German)

| No. | Question                                                                                                                                            |
|-----|-----------------------------------------------------------------------------------------------------------------------------------------------------|
| 1   | Did your child suffer from ill health constantly?                                                                                                   |
| 2   | Did your child eat and drink sufficiently?                                                                                                          |
| 3   | Do you think that further examinations (e.g. blood test) should have been done in order to verify your observations concerning your child's health? |
| 4   | Did your child's illness already appear "normal" to you?                                                                                            |
| 5   | Did your child regain full health between periods of illness?                                                                                       |
| 6   | Did your child's illness repeatedly affect the same body regions (e.g. always the ear, always the lungs, ...)?                                      |
| 7   | Did your child look slim/frail?                                                                                                                     |
| 8   | Did your child suffer from diarrhea?                                                                                                                |
| 9   | Did you regularly notice unusual breathing sounds?                                                                                                  |
| 10  | Did your child suffer from constant coughing?                                                                                                       |
| 11  | Did your child have swollen lymph nodes?                                                                                                            |
| 12  | Did your child suffer from high fever without the cause for the fever being found?                                                                  |
| 13  | Did you notice a regular white-ish film in your child's mouth that was difficult to wipe off?                                                       |
| 14  | Did your child have a small head compared to other children?                                                                                        |
| 15  | Would you say your child was fit enough for sports and physical exercise?                                                                           |
| 16  | Did antibiotics work satisfactorily when your child was treated with them?                                                                          |
| 17  | Do any known immunodeficiencies run in your family?                                                                                                 |
| 18  | Are there any known cases of children's deaths in your family for which no clear cause could be found?                                              |
| 19  | Would you say that exceptionally many members of your family have been diagnosed with cancer in the past?                                           |
| 20  | Did you have to take your child to hospital?                                                                                                        |
| 21  | Did doctors find any unusual blood values in your child (e.g. changes in blood count)?                                                              |
| 22  | Did your child suffer from pneumonia?                                                                                                               |
| 23  | Did you have to consult a doctor due to recurring earaches?                                                                                         |
| 24  | Did your child suffer from meningitis?                                                                                                              |
| 25  | Did you have to use antipyretic medication (per month)?                                                                                             |
| 26  | Did your child suffer from fevers that could not or not really be lowered by treatment with medication?                                             |
| 27  | Is it true that you repeatedly switched doctors because the reasons for your child's health issues could not be found?                              |
| 28  | Is it true that your child's health issues increased consistently?                                                                                  |
| 29  | Is it true that everyday incidents (like not being dressed warmly enough) sufficed for your child to fall ill?                                      |
| 30  | Is it true that your child's illnesses repeatedly showed the same or similar patterns?                                                              |

- 31 Is it true that your child's infections lasted longer than the ones of other children?
- 32 Is it true that your child was treated with antibiotics regularly?
- 33 Is it true that you consulted a doctor repeatedly due to similar or identical health issues?
- 34 Is it true that your child has always been a bit smaller than other children?
- 35 Is it true that the doctors could not tell what your child was suffering from?
- 36 Is it true that your child was absent from school/pre-school/kindergarten due to sickness more often than other children?

Suppl. Table 2. Diseases used for comparison with PID in step 2 (PID vs. noPID)

| Number | Disease                                                    |
|--------|------------------------------------------------------------|
| 1      | Undefined weakness                                         |
| 2      | Acute lymphatic leukemia                                   |
| 3      | Acute lymphatic leukemia                                   |
| 4      | Periodic fever without diagnosis of PID                    |
| 5      | Ulcerative colitis                                         |
| 6      | Severe bronchitis                                          |
| 7      | Multiple allergies with urticaria without diagnosis of PID |
| 8      | Solitary mild Infection with fever                         |
| 9      | Cystic fibrosis and diabetes                               |
| 10     | Progressive glomerulonephritis                             |
| 11     | Unspecific symptoms                                        |
| 12     | Multiple Allergies without diagnosis of PID                |
| 13     | Cystic fibrosis                                            |
| 14     | Leukemia                                                   |
| 15     | Brain tumor                                                |
| 16     | Cystic fibrosis                                            |
| 17     | Chronic renal failure                                      |
| 18     | Hemolytic uremic syndrome                                  |
| 19     | Burkitt lymphoma                                           |
| 20     | Denys-Drash-Syndrom                                        |
| 21     | Polycystic kidney disease                                  |
| 22     | Acute lymphatic leukemia                                   |
| 23     | Lymphoma                                                   |
| 24     | Chronic bronchitis without diagnosis of PID                |
| 25     | T-Cell Acute lymphatic leukemia                            |
| 26     | Epilepsy                                                   |
| 27     | Renal dysplasia                                            |

Suppl. Table 3. Core phenomena derived from parental observations (Original in German)

| Category Title                                              | Interview reference |
|-------------------------------------------------------------|---------------------|
| <b>Consultation</b>                                         |                     |
| Consultations from the parental point of view               | A,B,F,G,I,K,L       |
| Tentative diagnoses                                         | C,E,F,K,L           |
| Alarm signals for acute illness                             | E,H,L               |
| <b>Therapy</b>                                              |                     |
| Effectiveness of antibiotic treatment                       | A,H,I,J,L           |
| Antibiotic treatment                                        | A,G,J,K             |
| Use of immunoglobulin                                       | F,L                 |
| <b>Behavior</b>                                             |                     |
| ... of the parents                                          |                     |
| Evaluation of the own behavior by the parents               | A,I                 |
| Food intake                                                 | F,K,L               |
| Milestones of the development from the parental perspective | C,F,J               |
| <b>Infections</b>                                           |                     |
| Chronologic characteristics                                 | B,C,E,F,G,H,K,L     |
| Pathogens                                                   | E                   |
| Susceptibility to infections                                | C,D,F,G,L           |
| Otorhinolaryngology                                         | F,H,I,K             |
| Airway                                                      | F,G,I,J,L           |
| Sepsis or Meningitis                                        | H,L                 |
| <b>Attendant symptoms</b>                                   |                     |
| Fever                                                       | D,E,F,G,H,J,L       |
| Gastrointestinal                                            | F,I                 |
| <b>Perception of the disease</b>                            |                     |
| ... by professionals                                        | A,E,F,H,K,L         |
| ... by parents                                              |                     |
| Adaption to the disease                                     | A,C,D               |
| Training of parents in self diagnostic                      | A,H,L               |
| ... of infections by the parents                            | A,B,D,F,G,H,K,L     |
| Explanatory model                                           | C,G,H,K             |
| Health from the parental perspective                        | C,E,L               |
| Subjective feeling in daily life                            | D,K                 |

**Appearance of the child**

|                        |           |
|------------------------|-----------|
| Weight                 | A,F,K,L   |
| Lymphnodes             | B         |
| Musculoskeletal system | C         |
| Growth                 | F,H,I,L   |
| Skin                   | E,F,G,J,K |
| Cognitive development  | L         |

**Diseases in the family**

|                        |       |
|------------------------|-------|
| Immunodeficiencies     | G     |
| Unclear cases of death | E,F,J |
| Cancer                 | L     |

Suppl. Table 4. Example of prospective clinical cases

| Patient No | Symptoms                                                                                                                                 | Decision by                     |                                | diagnosis                                                                                                                                                                      |
|------------|------------------------------------------------------------------------------------------------------------------------------------------|---------------------------------|--------------------------------|--------------------------------------------------------------------------------------------------------------------------------------------------------------------------------|
|            |                                                                                                                                          | clinician                       | data mining                    |                                                                                                                                                                                |
| 1          | 3 years old female with wound healing disorder, multiple abscess, peritonitis with Staph. Aureus                                         | PID as far as possible excluded | no PID                         | CGD excluded, PAD improbable due to normal immunoglobulins                                                                                                                     |
| 2          | 5 years old male with fever (max 40 °C) every 3-4 days, antifebrils with little effect                                                   | PID probable                    | PID                            | PFAPA                                                                                                                                                                          |
| 3          | 14 years old male, pediatrician recommends further tests because of orofacial herpes twice monthly                                       | PID improbable                  | no PID                         | Immunoglobulins normal, antibodies from vaccination, NK- and T-cell function regular, subpopulations normal                                                                    |
| 4          | 9 years old male, Mycobacterium avium in cervical lymph nodes, fistula formation, nail mycosis, chronic squamous erythema at extremities | PID very likely                 | PID                            | functional deficient STAT4 signal transduction pathway                                                                                                                         |
| 5          | 10 years old female, infection of the anterior tibialis lodge with salmonella typhimurium, recurrent abscessus                           | rather not a PID                | no significant differentiation | lower total B-Cell count, lower IgM Memory cells, normal class switched B-Cell count. T-cells and NK-cells regular, immunoglobulins normal, complement diagnostics unobtrusive |
